# Supplementary material for: Spatiotemporal analysis of SARS-CoV-2 infection reveals an expansive wave of monocyte-derived macrophages associated with vascular damage and virus clearance in hamster lungs
Source: PubMed Central journal article supplement (PMC10782978; doi:10.1128/spectrum.02469-23), 2023-11-27
Supplement: reviewer-comments.pdf [file reviewer-comments.pdf]

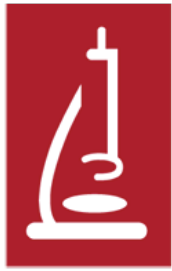

AMERICAN  
SOCIETY FOR  
MICROBIOLOGY

# Microbiology Spectrum

## Spatiotemporal analysis of SARS-CoV-2 infection reveals an expansive wave of monocyte-derived macrophages associated with vascular damage and virus clearance in hamster lungs

Ola Bagato, Anne Balkema-Buschmann, Daniel Todt, Saskia Weber, Andre Goemer, Bingqian Qu, Csaba Miskey, Zoltan Ivics, Thomas Mettenleiter, Stefan Finke, Richard Brown, Angele Breithaupt, and Dmitry Ushakov

*Corresponding Author(s): Dmitry Ushakov, Friedrich-Loeffler-Institut Bundesforschungsinstitut für Tiergesundheit*

---

### Review Timeline:

|                     |                    |
|---------------------|--------------------|
| Submission Date:    | June 13, 2023      |
| Editorial Decision: | August 13, 2023    |
| Revision Received:  | September 21, 2023 |
| Accepted:           | October 24, 2023   |

---

*Editor: Vaithilingaraja Arumugaswami*

*Reviewer(s): The reviewers have opted to remain anonymous.*

### Transaction Report:

(Note: With the exception of the correction of typographical or spelling errors that could be a source of ambiguity, letters and reports are not edited. The original formatting of letters and referee reports may not be reflected in this compilation.)

**DOI:** <https://doi.org/10.1128/spectrum.02469-23>

August 13, 2023

Dr. Dmitry S Ushakov  
Friedrich-Loeffler-Institut Bundesforschungsinstitut für Tiergesundheit  
Institute of Molecular Virology and Cell Biology  
Greifswald  
Germany

Re: Spectrum02469-23 (Spatiotemporal analysis of SARS-CoV-2 infection reveals an expansive wave of monocyte-derived macrophages associated with vascular damage and virus clearance in hamster lungs)

Dear Dr. Dmitry S Ushakov:

Thank you for submitting your manuscript to Microbiology Spectrum. When submitting the revised version of your paper, please provide (1) point-by-point responses to the issues raised by the reviewers as file type "Response to Reviewers," not in your cover letter, and (2) a PDF file that indicates the changes from the original submission (by highlighting or underlining the changes) as file type "Marked Up Manuscript - For Review Only". Please use this link to submit your revised manuscript - we strongly recommend that you submit your paper within the next 60 days or reach out to me. Detailed instructions on submitting your revised paper are below.

Link Not Available

Below you will find instructions from the Microbiology Spectrum editorial office and comments generated during the review.

ASM policy requires that data be available to the public upon online posting of the article, so please verify all links to sequence records, if present, and make sure that each number retrieves the full record of the data. If a new accession number is not linked or a link is broken, provide production staff with the correct URL for the record. If the accession numbers for new data are not publicly accessible before the expected online posting of the article, publication of your article may be delayed; please contact the ASM production staff immediately with the expected release date.

The ASM Journals program strives for constant improvement in our submission and publication process. Please tell us how we can improve your experience by taking this quick [Author Survey](#).

Sincerely,

Vaithilingaraja Arumugaswami

Editor, Microbiology Spectrum

Journals Department  
American Society for Microbiology  
1752 N St., NW  
Washington, DC 20036  
E-mail: [spectrum@asmusa.org](mailto:spectrum@asmusa.org)

Reviewer comments:

Reviewer #1 (Comments for the Author):

This manuscript by Bagato et al. demonstrates the involvement of monocyte-derived macrophages (MDMs) in SARS-Cov-2 clearance in hamster lungs, along with connection of MDM with endothelial injury. In this study the authors used a combination of light sheet fluorescent microscopy, immunohistochemistry, virological assays, and RNA sequencing analysis in hamster lung slices to produce their data. The data generated using the light sheet microscopy technology make this study interesting. However, use of limited number of animals (n= 2 or 3 per time point) and lack of rigor in statistical analysis weakens the study. Below are the key comments:  
Major comments

1. Figure 1b there is no clarity regarding the number of the animals (given as dots). In days 2 and 3 p.i for the brochi group (black color) there are only two dots (animals) instead of three. Please clarify.
2. Similarly, in Figure 1b day 6 and 7 the error bars are large for the AEC group. Also, the statistical analysis done for this graph is not clear. Authors should add additional animals to have statistically significant results.
3. The statement that the virus clearance is directly related to MDM is not supported by the experimental data in this manuscript. In order to make this statement, additional experiment such as MDM depletion in the context of SARS-CoV-2 infection is needed or this conclusion/statement can be removed throughout the manuscript.

Minor comment

1. Lines 75-79 "Studies.... immune response". This sentence is very long.

Reviewer #2 (Comments for the Author):

This is an interesting manuscript, which shows the molecular and cellular changes of SARS-CoV-2 infected hamster lung tissues. The investigators have utilized multiple methodologies, including Light Sheet Fluorescence Microscopy to address the role of MDM in the lung pathology.

To strengthen the conclusion, a) additional animals need to be included for each timepoint; b) The authors may consider utilizing Spatial Transcriptomics to map the infiltrating cell and lung cell population. This can be discussed.

Staff Comments:

### Preparing Revision Guidelines

To submit your modified manuscript, log onto the eJP submission site at <https://spectrum.msubmit.net/cgi-bin/main.plex>. Go to Author Tasks and click the appropriate manuscript title to begin the revision process. The information that you entered when you first submitted the paper will be displayed. Please update the information as necessary. Here are a few examples of required updates that authors must address:

- Point-by-point responses to the issues raised by the reviewers in a file named "Response to Reviewers," NOT IN YOUR COVER LETTER.
- Upload a compare copy of the manuscript (without figures) as a "Marked-Up Manuscript" file.
- Each figure must be uploaded as a separate file, and any multipanel figures must be assembled into one file.
- Manuscript: A .DOC version of the revised manuscript
- Figures: Editable, high-resolution, individual figure files are required at revision, TIFF or EPS files are preferred

For complete guidelines on revision requirements, please see the journal Submission and Review Process requirements at <https://journals.asm.org/journal/Spectrum/submission-review-process>. **Submissions of a paper that does not conform to Microbiology Spectrum guidelines will delay acceptance of your manuscript. "**

Please return the manuscript within 60 days; if you cannot complete the modification within this time period, please contact me. If you do not wish to modify the manuscript and prefer to submit it to another journal, please notify me of your decision immediately so that the manuscript may be formally withdrawn from consideration by Microbiology Spectrum.

If your manuscript is accepted for publication, you will be contacted separately about payment when the proofs are issued; please follow the instructions in that e-mail. Arrangements for payment must be made before your article is published. For a complete list of **Publication Fees**, including supplemental material costs, please visit our [website](#).

Corresponding authors may [join or renew ASM membership](#) to obtain discounts on publication fees. Need to upgrade your membership level? Please contact Customer Service at [Service@asmusa.org](mailto:Service@asmusa.org).

Thank you for submitting your paper to Microbiology Spectrum.

Reviewer comments:

Reviewer #1 (Comments for the Author):

This manuscript by Bagato et al. demonstrates the involvement of monocyte-derived macrophages (MDMs) in SARS-Cov-2 clearance in hamster lungs, along with connection of MDM with endothelial injury. In this study the authors used a combination of light sheet fluorescent microscopy, immunohistochemistry, virological assays, and RNA sequencing analysis in hamster lung slices to produce their data. The data generated using the light sheet microscopy technology make this study interesting.

Thanks for the positive comments and highlighting that the light sheet microscopy technology makes this manuscript interesting. This is still a rather new approach in the virology field, but it has a tremendous potential in pathogenesis research. Indeed, we believe that in addition to the scientific data outcome which is of interest for a broad readership, publication in *Microbiology Spectrum* would greatly support such approaches in infection biology research.

However, use of limited number of animals (n= 2 or 3 per time point) and lack of rigor in statistical analysis weakens the study. Below are the key comments:

As discussed below, we are bound to the limited number of animals per time point. In total, we analyzed 27 hamsters (3 per time point) and achieved compatible results by different techniques. For ethical reasons we cannot do further animal experiments and in particular the light sheet analysis will require too much time to finish an extended study in a reasonable time. Nonetheless, the drawn conclusions are supported by the data and we are convinced that the data are sufficient for publication.

Major comments

1. Figure 1b there is no clarity regarding the number of the animals (given as dots).

We added information about the number of animals per time point in each figure legend.

In days 2 and 3 p.i for the brochi group (black color) there are only two dots (animals) instead of three. Please clarify.

The reviewer is right. At days 2 and 3 dpi, for the main bronchi we could only include data from 2 animals (as indicated by the number of dots). The main bronchi were not available on the slide for technical reasons for these animals, thus the number of bronchi available is only two. For the distal bronchi and AEC all 3 animals per time point were included, even at days 2 and 3. However, we have now repeated the sectioning and updated the figure 1b with 3 animals in the main bronchi group at these time points. In summary, these data clearly show that virus antigen detection is reduced in time compared to antigen detection in the alveolar areas. To highlight this further we added a reference to Fig. 1b in the relevant sentence in the results (line 135), and added a sentence in discussion section:

Line 353: This observation is corroborated by the histopathology data, which clearly show that virus antigen localization is shifted over time from the bronchial to the alveolar areas.

2. Similarly, in Figure 1b day 6 and 7 the error bars are large for the AEC group. Also, the statical

analysis done for this graph is not clear. Authors should add additional animals to have statistically significant results.

We agree that the error bars are large. However, this is exactly what we expect in a later phase of infection where the time course divergence depends on individual immune reactions and distribution of remaining antigen positive areas in the lung. In addition, in conventional IHC as done in Fig. 1b, the choice of the small analysed regions also contributes to the quantitative outcome. This is a perfect argument for implementation of high volume data analysis as we did here by the light sheet microscopy in order to address at least the latter point. But even there, a certain degree of variation is expected due to variability in individual time courses of infection. However, we updated the figure 1b and, in addition to individual values for each time point, median bars without the error are shown to reflect the fact that it is a semi-quantitative analysis. Independent of these weakening aspects, the presented data clearly show the overall spatiotemporal development of SARS-CoV-2 antigen presence, both by conventional IHC and by light sheet imaging. Although we would love to include more animals, for ethical and resource reasons we are not able to repeat the whole experiment including the complex downstream analysis. Thus, we prefer to remain at the number of analysed animals, which is sufficient to support our drawn conclusions. To address this point, we included a sentence about this “potential weakness” in the discussion:

Line 416: Our study was limited to three animals per time point for both ethical and technical reasons, which can lead to data variability due to differences in individual time courses of infection.

3. The statement that the virus clearance is directly related to MDM is not supported by the experimental data in this manuscript. In order to make this statement, additional experiment such as MDM depletion in the context of SARS-CoV-2 infection is needed or this conclusion/statement can be removed throughout the manuscript.

We apologize for this misunderstanding. As highlighted in the title, we demonstrate that an expansive wave of monocyte-derived macrophages is associated with vascular damage and virus clearance and we do not show data that they are really causative for virus elimination, which can only be discussed as a resulting hypothesis. We have revised the whole manuscript for correct expression of this and did the following modifications:

Line 30 old: We show that MDM are directly linked to virus clearance, and appear in connection with virus clearance and endothelial injury.

Line 30 new: We show that MDM appear in parallel with virus clearance and endothelial injury.

Line 175 old: suggesting their direct involvement in virus clearance

Line 174 new: suggesting their potential involvement in virus clearance

Line 417 old: response followed by MDM-driven virus clearance

Line 422 new: response followed by the virus clearance

Minor comment

1. Lines 75-79 "Studies.... immune response". This sentence is very long.

We have split and rephrased the sentence

Line 75 old: Studies using the hamster SARS-CoV-2 infection model demonstrated that it largely phenocopies the moderate form of COVID-19 in humans, inducing focal diffuse alveolar destruction,

hyaline membrane formation, and mononuclear cell infiltration making it an important tool for detailed investigations of tissue infection and the subsequent immune response

Line 75 new: Studies using the hamster SARS-CoV-2 infection model demonstrated that it largely phenocopies the moderate form of COVID-19 in humans, inducing focal diffuse alveolar destruction, hyaline membrane formation, and mononuclear cell infiltration. These similarities make it an important tool for detailed investigations of tissue infection and the subsequent immune response

Reviewer #2 (Comments for the Author):

This is an interesting manuscript, which shows the molecular and cellular changes of SARS-CoV-2 infected hamster lung tissues. The investigators have utilized multiple methodologies, including Light Sheet Fluorescence Microscopy to address the role of MDM in the lung pathology.

Thanks a lot for these positive comments. Please also note our commentary to the importance of spreading the light sheet microscopy approach in a wider infection biology community.

To strengthen the conclusion, a) additional animals need to be included for each timepoints;

For ethical and resource reasons already given above, we are unfortunately not able to address this by more animals. Also as discussed we are convinced that by using “multiple methodologies” the manuscript provides clear cut results that are worthwhile for publication with the present number of animals.

b) The authors may consider utilizing Spatial Transcriptomics to map the infiltrating cell and lung cell population. This can be discussed.

Thanks to the reviewer to keep this optional, as we don't have the spatial transcriptomics at hand. Moreover, implementing this approach would require new sample preparation from new animal experiments, since left tissue samples are not useful for such studies. However, we now highlight the potential of further studies based on spatial transcriptomics to further connect the transcriptomics data to the spatiotemporal context of the SARS-CoV-2 infection analysed here.

Line 418: Moreover, further granular information could be obtained with advanced omics approaches, such as spatial transcriptomics. This would allow spatial and functional mapping of the infiltrating cells and individual lung cell populations, and it may be the focus for future research.

Re: Spectrum02469-23R1 (Spatiotemporal analysis of SARS-CoV-2 infection reveals an expansive wave of monocyte-derived macrophages associated with vascular damage and virus clearance in hamster lungs)

Dear Dr. Dmitry S Ushakov:

Your manuscript has been accepted, and I am forwarding it to the ASM production staff for publication. Your paper will first be checked to make sure all elements meet the technical requirements. ASM staff will contact you if anything needs to be revised before copyediting and production can begin. Otherwise, you will be notified when your proofs are ready to be viewed.

**Data Availability:** ASM policy requires that data be available to the public upon online posting of the article, so please verify all links to sequence records, if present, and make sure that each number retrieves the full record of the data. If a new accession number is not linked or a link is broken, provide production staff with the correct URL for the record. If the accession numbers for new data are not publicly accessible before the expected online posting of the article, publication may be delayed; please contact ASM production staff immediately with the expected release date.

**Publication Fees:** For information on publication fees and which article types have charges, please visit our [website](#). We have partnered with Copyright Clearance Center (CCC) to collect author charges. If fees apply to your paper, you will receive a message from no-reply@copyright.com with further instructions. For questions related to paying charges through RightsLink, please contact CCC at ASM\_Support@copyright.com or toll free at +1-877-622-5543. CCC makes every attempt to respond to all emails within 24 hours.

**ASM Membership:** Corresponding authors may [join or renew ASM membership](#) to obtain discounts on publication fees. Need to upgrade your membership level? Please contact Customer Service at [Service@asmusa.org](mailto:Service@asmusa.org).

**PubMed Central:** ASM deposits all Spectrum articles in PubMed Central and international PubMed Central-like repositories immediately after publication. Thus, your article is automatically in compliance with the NIH access mandate. If your work was supported by a funding agency that has public access requirements like those of the NIH (e.g., the Wellcome Trust), you may post your article in a similar public access site, but we ask that you specify that the release date be no earlier than the date of publication on the Spectrum website.

**Embargo Policy:** A press release may be issued as soon as the manuscript is posted on the [Spectrum Latest Articles webpage](#). The corresponding author will receive an email with the subject line "ASM Journals Author Services Notification" when the article is available online.

The ASM Journals program strives for constant improvement in our submission and publication process. Please tell us how we can improve your experience by taking this quick [Author Survey](#).

Thank you for submitting your paper to Spectrum.

Sincerely,  
Vaithilingaraja Arumugaswami  
Editor  
Microbiology Spectrum
